# Supplementary material for: Gd-Metallofullerenol nanoparticles cause intracellular accumulation of PDGFR-α and morphology alteration of fibroblasts
Source: Royal Society of Chemistry journal article supplement (doi:10.1039/c8nr08667b), 2018-12-10
Supplement: c8nr08667b1.pdf [file c8nr08667b1.pdf]

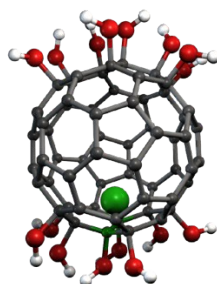

Figure S1. Theoretical structure of single Gd@C<sub>82</sub>(OH)<sub>22</sub> molecule.

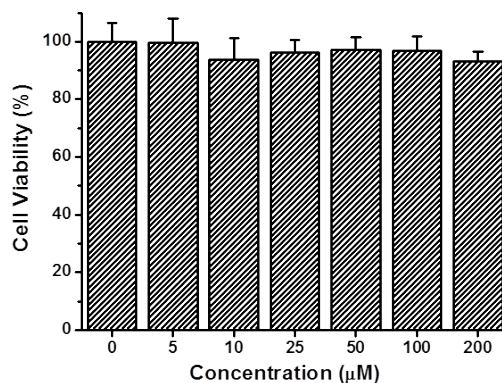

Figure S2. The toxicity of Gd@C<sub>82</sub>(OH)<sub>22</sub> to the NIH-3T3 fibroblast cells. NIH-3T3 cells were treated with different concentrations of Gd@C<sub>82</sub>(OH)<sub>22</sub> nanoparticles for 24 h and analyzed by CCK-8 assays.

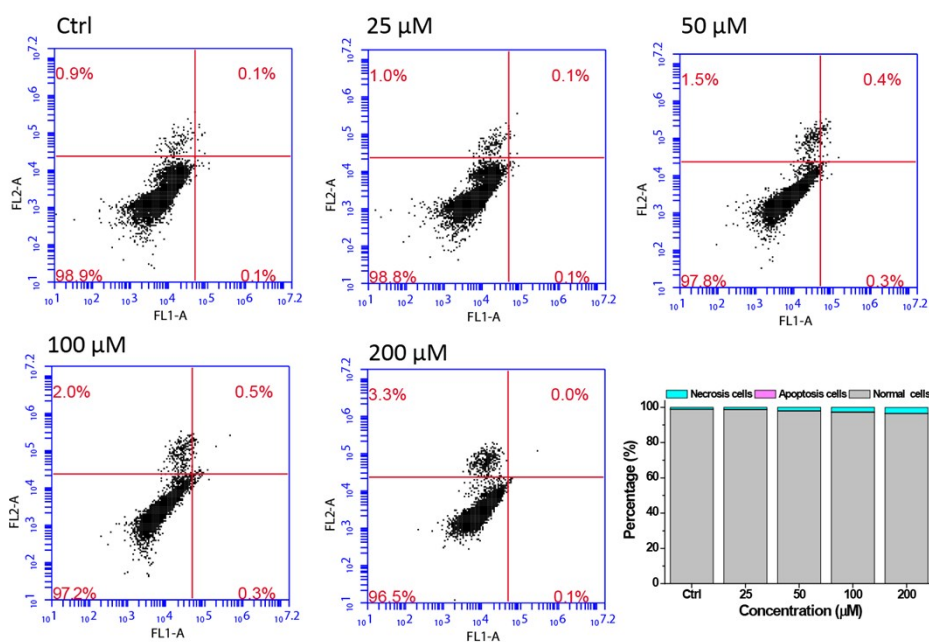

Figure S3. Cell apoptosis and necrosis analysis of NIH-3T3 cells after different concentrations of Gd-metallofullerenol nanoparticles treatment. NIH-3T3 cells were seeded into 6-well plates for 24 h with a density of  $5 \times 10^4$ . When cells grew to 70% confluence, they were treated with different concentrations of Gd-metallofullerenol nanoparticles for 24 h. Finally, NIH-3T3 cells were collected and examined to determine the percentages of apoptosis and necrosis cells.

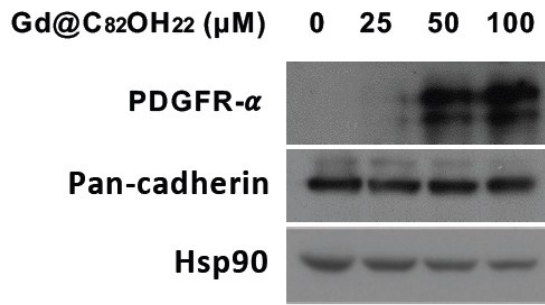

**Figure S4. Dose effects of Gd-metallofullerenol nanoparticles on the accumulation of PDGFR-α in NIH-3T3 cells.** NIH-3T3 cells were treated with different concentration of Gd-metallofullerenol nanoparticles for 48 h. The protein levels were determined by Western blot analysis.

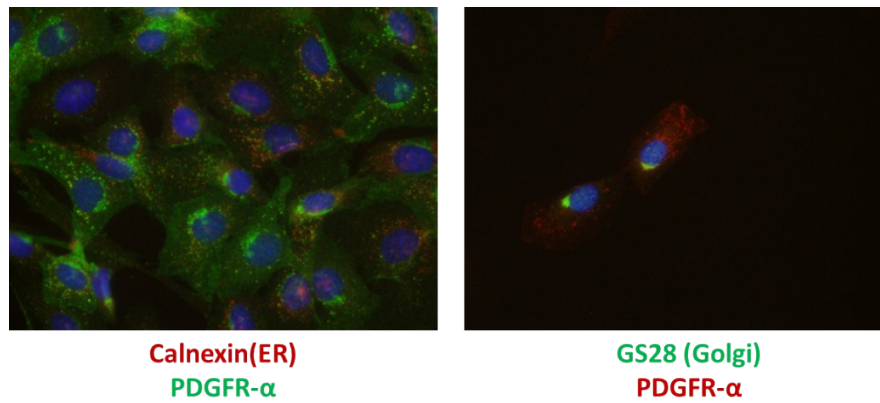

**Figure S5. Intracellular co-localization of PDGFR-α with endoplasmic reticulum (left) and Golgi complex (right) after Gd@C<sub>82</sub>(OH)<sub>22</sub> treatment.**

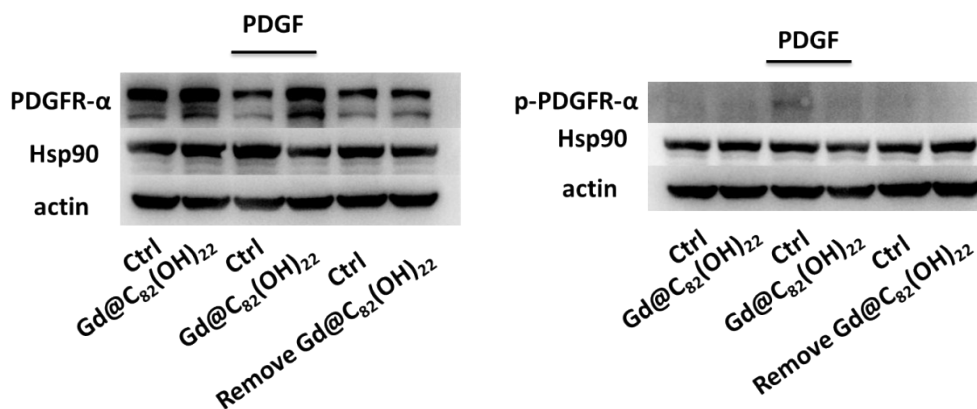

**Figure S6. Western blot analysis of PDGFR-α expression and its phosphorylation with or without Gd@C<sub>82</sub>(OH)<sub>22</sub> and withdraw adverse.** NIH-3T3 fibroblast cells were pretreated with or without Gd@C<sub>82</sub>(OH)<sub>22</sub> nanoparticles for 24 h and then treated with PDGF for 20 min. For the withdraw adverse assay, cells were treat with Gd@C<sub>82</sub>(OH)<sub>22</sub> nanoparticles for 24 h and then refresh the medium for another 12 h.
